# Supplementary material for: Development and Validation of a Prognostic Model for Osteoarthritis Risk in Older Adults with a History of Stroke: A Cross-sectional Analysis Based on NHANES 2011–2018
Source: Research Square preprint supplement (doi:10.21203/rs.3.rs-7063991/v1), 2025-07-25
Supplement: Supplementary file 1 [file 27e10d71f31f86d39e49a488.docx]

Table 1 Demographic data and clinical characteristics of the training and validation sets.

| **Characteristics** | **Total participant cohort (n=1077)** | **Training set**  **(n=754)** | **Validation set**  **(n=323)** | **P-value** |
| --- | --- | --- | --- | --- |
| Age | 66.6 (12.6) | 67.2 (11.9) | 66.4 (13.0) | 0.283 |
| Gender |  |  |  | 0.879 |
| Male | 528 (49.0%) | 160 (49.5%) | 368 (48.8%) |  |
| Female | 549 (51.0%) | 163 (50.5%) | 386 (51.2%) |  |
| Course of disease |  |  |  | 0.330 |
| ≥10 years | 273 (25.3%) | 75 (23.2%) | 198 (26.3%) |  |
| <10 years | 804 (74.7%) | 248 (76.8%) | 556 (73.7%) |  |
| Race |  |  |  | 0.757 |
| Mexican American | 98 (9.10%) | 24 (7.43%) | 74 (9.81%) |  |
| Other Hispanic | 73 (6.78%) | 23 (7.12%) | 50 (6.63%) |  |
| Non-Hispanic White | 502 (46.6%) | 152 (47.1%) | 350 (46.4%) |  |
| Non-Hispanic Black | 306 (28.4%) | 96 (29.7%) | 210 (27.9%) |  |
| Other Race | 98 (9.10%) | 28 (8.67%) | 70 (9.28%) |  |
| Education |  |  |  | 0.280 |
| Less than high school | 349 (32.4%) | 107 (33.1%) | 242 (32.1%) |  |
| High school | 295 (27.4%) | 97 (30.0%) | 198 (26.3%) |  |
| College graduate or above | 433 (40.2%) | 119 (36.8%) | 314 (41.6%) |  |
| Marital |  |  |  | 0.421 |
| Divorce | 535 (49.7%) | 166 (51.4%) | 369 (48.9%) |  |
| Married | 142 (13.2%) | 48 (14.9%) | 94 (12.5%) |  |
| Unmarried | 171 (15.9%) | 45 (13.9%) | 126 (16.7%) |  |
| Widow | 229 (21.3%) | 64 (19.8%) | 165 (21.9%) |  |
| BMI (kg/m2) |  |  |  |  |
| Underweight | 15 (1.39%) | 9 (2.79%) | 6 (0.80%) | 0.079 |
| Normal weight | 261 (24.2%) | 73 (22.6%) | 188 (24.9%) |  |
| Overweight | 327 (30.4%) | 95 (29.4%) | 232 (30.8%) |  |
| Obesity | 474 (44.0%) | 146 (45.2%) | 328 (43.5%) |  |
| General health condition |  |  |  | 0.388 |
| Good | 519 (48.2%) | 148 (45.8%) | 371 (49.2%) |  |
| Fair | 428 (39.7%) | 130 (40.2%) | 298 (39.5%) |  |
| Poor | 130 (12.1%) | 45 (13.9%) | 85 (11.3%) |  |
| Asthma |  |  |  | 0.850 |
| Yes | 239 (22.2%) | 70 (21.7%) | 169 (22.4%) |  |
| No | 838 (77.8%) | 253 (78.3%) | 585 (77.6%) |  |
| Coronary heart disease |  |  |  | 0.565 |
| Yes | 203 (18.8%) | 57 (17.6%) | 146 (19.4%) |  |
| No | 874 (81.2%) | 266 (82.4%) | 608 (80.6%) |  |
| Emphysema |  |  |  | 1.000 |
| Yes | 82 (7.61%) | 25 (7.74%) | 57 (7.56%) |  |
| No | 995 (92.4%) | 298 (92.3%) | 697 (92.4%) |  |

TABLE 1 (Continued)

| **Characteristics** | **Total participant cohort (n=1077)** | **Training set**  **(n=754)** | **Validation set**  **(n=323)** | **P-value** |
| --- | --- | --- | --- | --- |
| Chronic bronchitis |  |  |  | 0.523 |
| Yes | 128 (11.9%) | 42 (13.0%) | 86 (11.4%) |  |
| No | 949 (88.1%) | 281 (87.0%) | 668 (88.6%) |  |
| Liver condition |  |  |  | 0.784 |
| Yes | 82 (7.61%) | 23 (7.12%) | 59 (7.82%) |  |
| No | 995 (92.4%) | 300 (92.9%) | 695 (92.2%) |  |
| Cancer or malignancy |  |  |  | 0.349 |
| Yes | 231 (21.4%) | 63 (19.5%) | 168 (22.3%) |  |
| No | 846 (78.6%) | 260 (80.5%) | 586 (77.7%) |  |
| Osteoporosis |  |  |  | 0.357 |
| Yes | 165 (15.3%) | 44 (13.6%) | 121 (16.0%) |  |
| No | 912 (84.7%) | 279 (86.4%) | 633 (84.0%) |  |
| Diabetes |  |  |  | 0.303 |
| Yes | 364 (33.8%) | 117 (36.2%) | 247 (32.8%) |  |
| No | 713 (66.2%) | 206 (63.8%) | 507 (67.2%) |  |
| Trouble sleeping or  Sleeping too much |  |  |  | 0.899 |
| Yes | 525 (48.7%) | 156 (48.3%) | 369 (48.9%) |  |
| No | 552 (51.3%) | 167 (51.7%) | 385 (51.1%) |  |
| Feeling tired or having.  Little energy |  |  |  | 0.685 |
| Yes | 685 (63.6%) | 202 (62.5%) | 483 (64.1%) |  |
| No | 392 (36.4%) | 121 (37.5%) | 271 (35.9%) |  |
| Difficulty stooping,  crouching, kneeling |  |  |  | 0.678 |
| Yes | 309 (28.7%) | 96 (29.7%) | 213 (28.2%) |  |
| No | 768 (71.3%) | 227 (70.3%) | 541 (71.8%) |  |
| Difficulty standing |  |  |  | 0.170 |
| Yes | 282 (26.2%) | 75 (23.2%) | 207 (27.5%) |  |
| No | 795 (73.8%) | 248 (76.8%) | 547 (72.5%) |  |
| Smoking |  |  |  | 0.030 |
| Yes | 418 (38.8%) | 109 (33.7%) | 309 (41.0%) |  |
| No | 659 (61.2%) | 214 (66.3%) | 445 (59.0%) |  |
| Alcohol Use |  |  |  | 0.775 |
| Yes | 549 (51.0%) | 162 (50.2%) | 387 (51.3%) |  |
| No | 528 (49.0%) | 161 (49.8%) | 367 (48.7%) |  |
| BMD | 1.05 (0.13) | 1.06 (0.13) | 1.05 (0.14) | 0.361 |
| Total 25(OH)D (nmol/L) | 71.7 (33.5) | 71.5 (34.0) | 71.8 (33.3) | 0.893 |
| UA（mg/dL） | 5.82 (1.59) | 5.91 (1.61) | 5.78 (1.59) | 0.247 |
| ALB（g/dL） | 4.07 (0.36) | 4.06 (0.34) | 4.07 (0.37) | 0.478 |

TABLE 1 (Continued)

| **Characteristics** | **Total participant cohort (n=1077)** | **Training set**  **(n=754)** | **Validation set**  **(n=323)** | **P-value** |
| --- | --- | --- | --- | --- |
| TC（mmol/L） | 4.67 (1.19) | 4.67 (1.20) | 4.66 (1.19) | 0.948 |
| TG（mmol/L） | 1.72 (1.12) | 1.67 (1.01) | 1.75 (1.17) | 0.249 |
| HDL-C（mmol/L） | 1.33 (0.43) | 1.37 (0.47) | 1.32 (0.41) | 0.086 |
| LDL-C（mmol/L） | 2.59 (1.01) | 2.59 (1.03) | 2.59 (1.00) | 0.991 |
| Cr（umol/L） | 102 (75.6) | 106 (87.5) | 100 (69.9) | 0.337 |
| BUN（mmol/L） | 6.35 (3.54) | 6.55 (3.69) | 6.26 (3.46) | 0.225 |
| Glu（mmol/L） | 6.49 (2.87) | 6.56 (2.92) | 6.46 (2.85) | 0.606 |
| HbA1c（%） | 6.20 (1.32) | 6.26 (1.39) | 6.17 (1.29) | 0.310 |

BMD, Bone Mineral Density; UA, Uric Acid; ALB, Albumin; TC, Total Cholesterol; TG, Triglycerides; HDL-C, High Density Lipoprotein; LDL-C, Low Density Lipoprotein; Cr, Creatinine; BUN, Blood Urea Nitrogen; GLU, Glucose; HbA1c, Glycated hemoglobin
